# Supplementary material
Source: bioRxiv or medRxiv preprint supplement (https://www.biorxiv.org/highwire/filestream/84127/field_highwire_adjunct_files/0/272112-1.pdf)

## SUPPORTING MATERIALS AND METHODS

### Quantitative real-time RT-PCR

Gene expression studies were performed with real-time RT-PCR (StepOne plus, Applied Biosystems) using the Power SyBR Green master mix (Applied Biosystems). Primers used are indicated in Supplemental Table S1. *Ubiquitin carboxy-terminal hydrolase* gene was used as internal standard for normalization of RNA levels. RNA purification and cDNA synthesis were carried out as previously described (Tejada-Jiménez et al., 2015)

**Tejada-Jiménez M, Castro-Rodríguez R, Kryvoruchko I, Lucas MM, Udvardi M, Imperial J, González-Guerrero M (2015) *Medicago truncatula* Natural Resistance-Associated Macrophage Protein1 is required for iron uptake by rhizobia-infected nodule cells. *Plant Physiol.* **168**: 258-272**

Table S1. Primers used in this study

| Name              | Sequence (5' - 3')                                          | Use                                                                |
|-------------------|-------------------------------------------------------------|--------------------------------------------------------------------|
| 5MtMOT1.2 +1689QF | GACCGAACTTTGCAGAAAGCA                                       | Quantitative expression of <i>MtMOT1.2</i>                         |
| 3MTMOT1.2 +1813QR | TGGGGATTTGGCTTGTCATCA                                       | Quantitative expression of <i>MtMOT1.2</i>                         |
| 5MtUBqF           | GAACTTGTTGCATGGGTCTTGA                                      | Quantitative expression of MtUbiquitin carboxyl-terminal hydrolase |
| 3MtUBqR           | CATTAAGTTTGACAAAGAGAAAGAGACAGA                              | Quantitative expression of MtUbiquitin carboxyl-terminal hydrolase |
| 5MtMOT1.2-1446pGW | GGGACAAGTTTGTACAAAAAAGCAG<br>GCTTTGTAACCTTTTGTATCCCTTTTG    | <i>MtMOT1.2</i> promoter cloning into pGWB3 and pGWB13 vector      |
| 3MtMOT1.2pGW      | GGGGACCACTTTGTACAAGAAAGCTG<br>GGTAGGTCCAAGATTTTGT TTTTGGGAC | <i>MtMOT1.2</i> promoter cloning into pGWB3 vector                 |
| 3MtMOT1.2 1361 GW | GGGGACCACTTTGTACAAGAAAGCTG<br>GGTATGGTTTATCTTTTGTCAAATTCC   | <i>MtMOT1.2</i> promoter cloning into pGWB13 and pGWB5 vector      |
| 5MtMOT1.2 GW      | GGGGACAAGTTTGTACAAAAAAGCA<br>GGCTATGGCAAACCAA AACTCTCATCC   | <i>MtMOT1.2</i> promoter cloning into pGWB5 vector                 |

## SUPPLEMENTAL FIGURE LEGENDS

**Supplemental Figure S1.** *Medicago truncatula* Molybdate Transporter 1.2 (*MtMOT1.2*) gene is expressed around the nodule vessels. Bleach-clarified image of section shown in Fig. 2C. Scale Bar = 25  $\mu$ m.

**Supplemental Figure S2.** *Medicago truncatula* Molybdate Transporter 1.2 (*MtMOT1.2*) is located in the endodermis. Cross-section of a 28 days-post-inoculation (dpi) *M. truncatula* nodule expressing *MtMOT1.2-HA* and inoculated with a *Sinorhizobium meliloti* strain constitutively expressing the green fluorescent protein (GFP) (green). *MtMOT1.2-HA* was detected using an Alexa594-conjugated antibody (red). DNA was stained with DAPI (blue), and the Casparian strip shows autofluorescence in the blue channel. Top left panel, localization of DAPI-stained DNA (blue), *S. meliloti* (green) and the Casparian strip (indicated by arrow-heads). Top right panel *MtMOT1.2-HA* localization. Lower panel, overlay of the two previous panels. Scale bars= 25  $\mu$ m.

**Supplemental Figure S3.** Autofluorescence control for the confocal immunolocalization of *MtMOT1.2-HA*. (A) Cross-section of a 28 days-post-inoculation (dpi) *M. truncatula* nodule expressing *MtMOT1.2-HA* and inoculated with a *Sinorhizobium meliloti* strain constitutively expressing the green fluorescent protein (GFP) (green). DNA was stained with DAPI (blue). Top left panel, transillumination image; top right panel, Alexa594 emission channel; lower left panel, *S. meliloti* GFP; lower right panel, DAPI-stained DNA. Scale bars= 0.2 mm. (B) Cross section of a 28 dpi *M. truncatula* nodules expressing *MtMOT1.2-HA*. Top left panel, transillumination image; top right panel, Alexa594 emission channel; lower panel, xylem autofluorescence. Scale bars= 0.1 mm.

**Supplemental Figure S4.** Autofluorescence control for the *Nicotiana benthamiana* agroinfiltration assays. (A) Emission in the cyan fluorescent protein (CFP) channel (left panel), green fluorescent protein (GFP) channel (central panel); and overlay of the two with the transillumination image (right panel) of leaves infiltrated with the AtPIP2-CFP construction. Scale bars= 0.05 mm. (B) Emission in the CFP channel (left panel), GFP channel (central panel); and overlay of the two with the transillumination image (right panel) of leaves infiltrated with the *MtMOT1.2-GFP* construction. Scale bars= 0.1 mm.

**Supplemental Figure S5.** Negative control for the immunodetection of MtMOT1.2-HA with gold-conjugated antibodies. Scale Bar = 0.5  $\mu$ m.

**Supplemental Figure S6.** *Medicago truncatula* Molybdate Transporter 1.2 (MtMOT1.2) is not required for growth under non-symbiotic conditions under low-iron conditions. (A) Growth of representative WT and *mot1.2-1* plants watered with KNO<sub>3</sub>. Scale bar= 1 cm. (B) Dry weight of shoots and roots. Data are the mean  $\pm$  SD of at least 6 independently transformed plants. (C) Nitrate reductase activity. Nitrate reduction was measured in duplicate. Data are the mean  $\pm$  SD.

**Supplemental Figure S7.** Mutation of *Medicago truncatula* Molybdate Transporter 1.2 (*MtMOT1.2*) does not affect nodule development. (A) Longitudinal section of 28 days-post-inoculation (dpi) nodules from wild type (WT) or mutant *mot1.2-1* plants stained with toluidine blue. Scale bars = 0.1 mm. (B) Kinetics of nodule appearance in WT and *mot1.2-1* plants. Data are the mean  $\pm$  SD of 15 plants.

**Supplemental Figure S8.** Molybdate-dependence of the *mot1.2-1* phenotype. (A) Growth of representative 28 days-post-inoculation WT and *mot1.2-1* plants watered with standard 4 nM Mo nutrient solution or one fortified with 100 nM Mo. Scale bar= 1 cm. (B) Nodule fresh weight from 28 dpi WT and *mot1.2-1* plants watered with standard 4 nM Mo nutrient solution or one fortified with 100 nM Mo. Data are the mean  $\pm$  SD of at least 12 plants. \* indicates a statistically significant difference (P<0.05). (c) Nitrogenase activity of 28 dpi WT and *mot1.2-1* plants watered with standard 4 nM Mo nutrient solution or one fortified with 100 nM Mo. Data are the mean  $\pm$  SD of at least 4 sets of 4 pooled plants. \* indicates a statistically significant difference (P<0.05).



Supplemental Figure S1

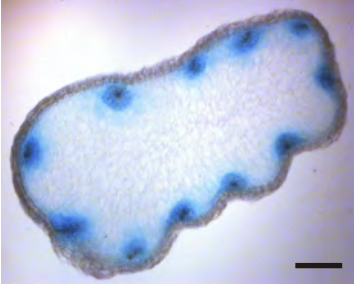

Supplemental Figure S2

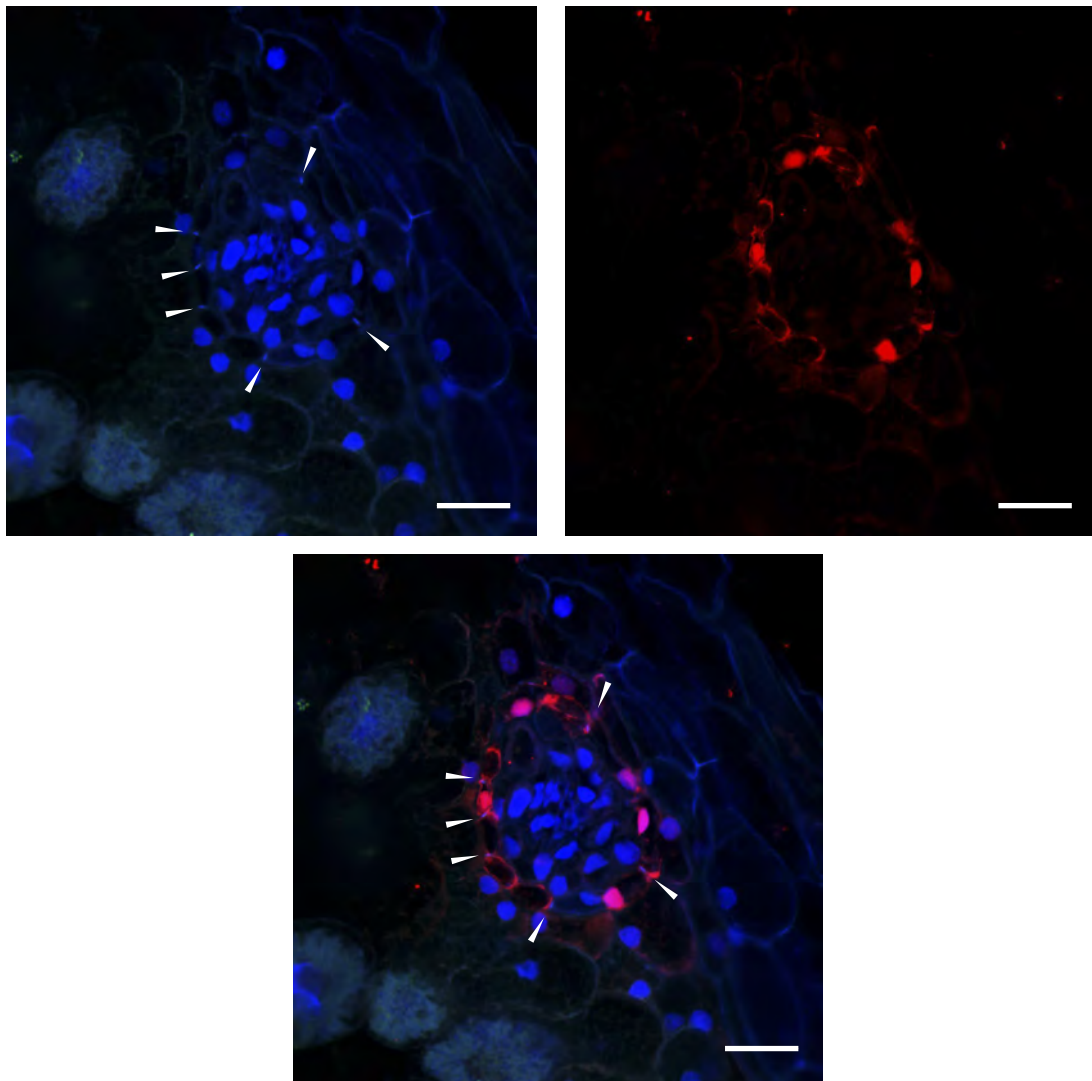

Supplemental Figure S3

A

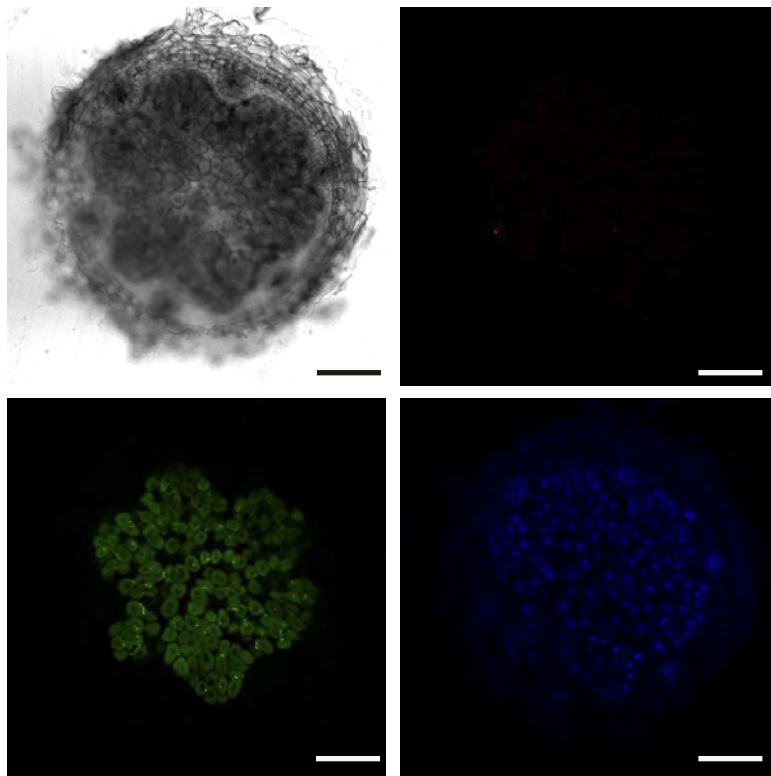

B

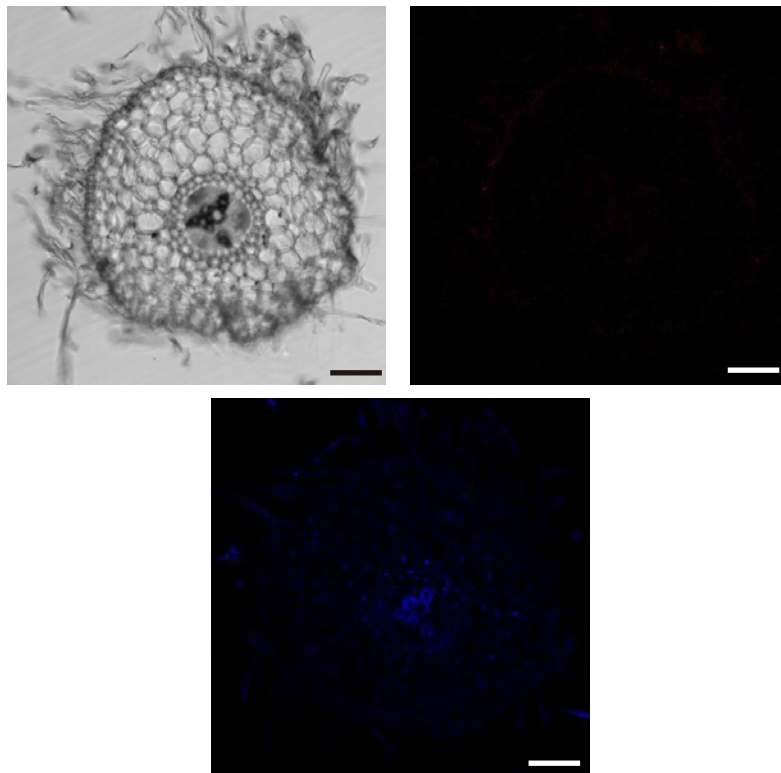

Supplemental Figure S4

A

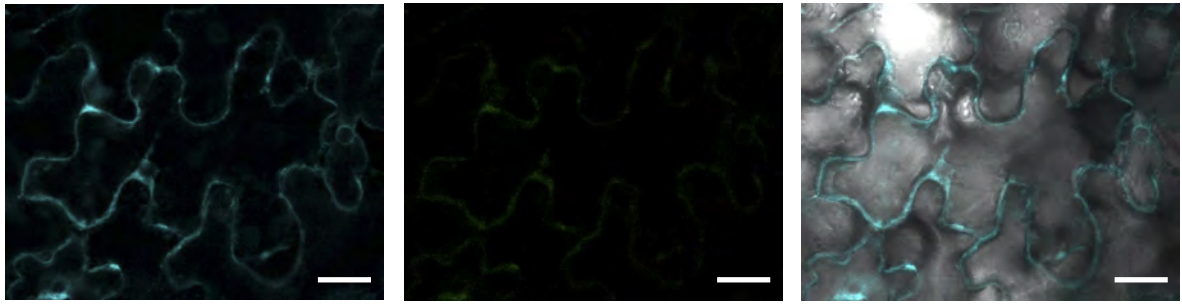

B

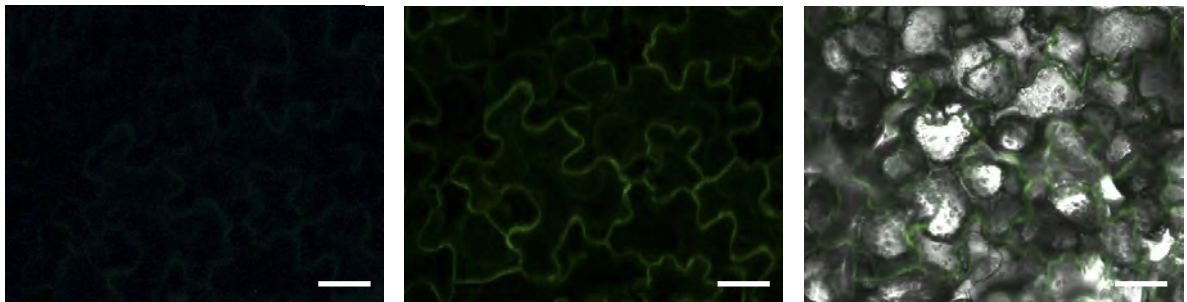

Supplemental Figure S5

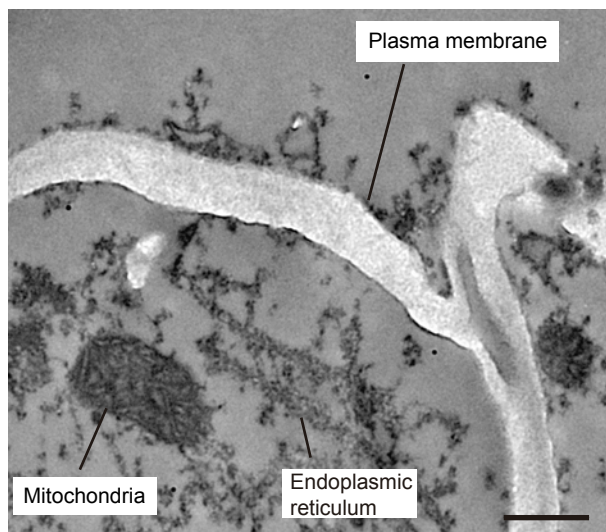

Supplemental Figure S6

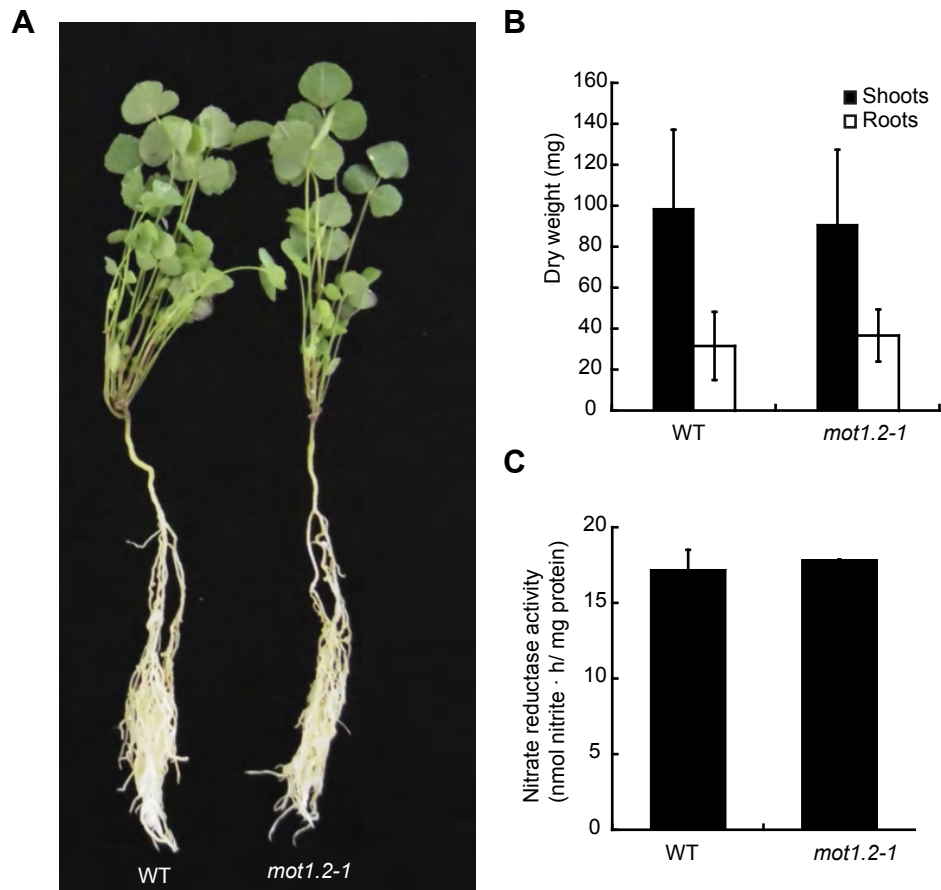

Figure S7

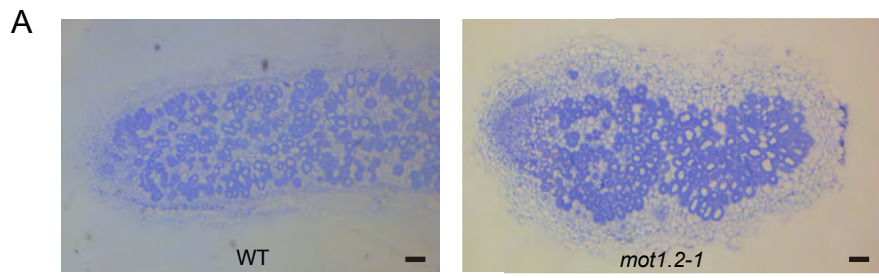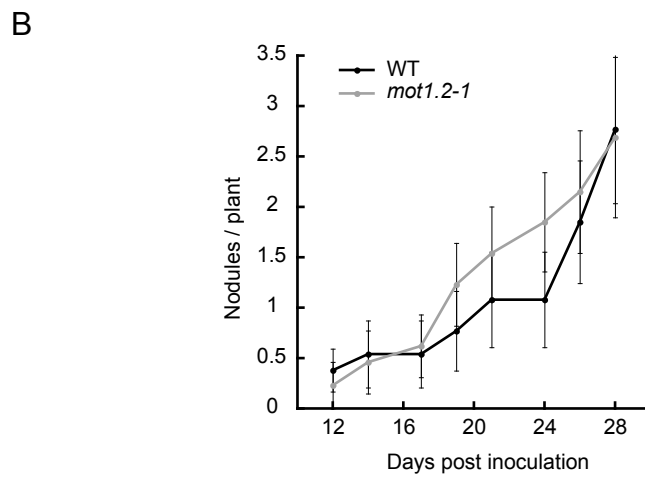

# Supplemental Figure S8

A

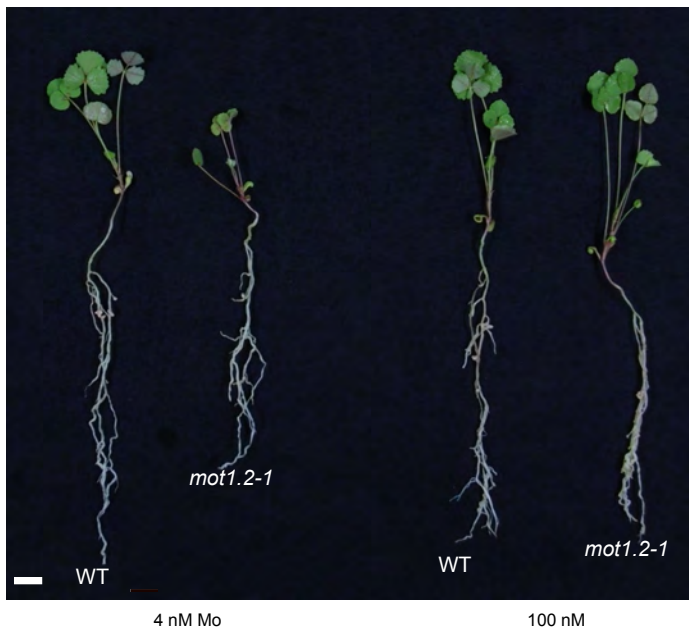

B

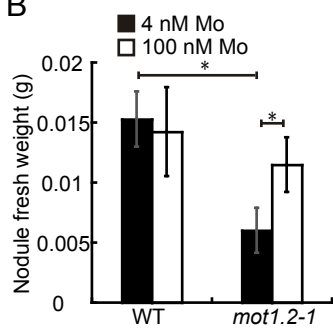

C

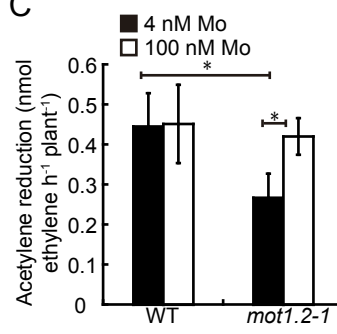

Supplement: Supplementary file [file 272112-1.pdf]
